# Supplementary material
Source: PubMed Central journal article supplement (PMC3754164)
Supplement: AEM.01347-13_zam999104695so1.pdf [file AEM.01347-13_zam999104695so1.pdf]

1 Supplemental material

2

3 Slide preparation method (in detail)

- 4 1. Clean two microscope glass slides (e.g. Knittel Glass, 7.6 x 2.6 cm,) with 70% ethanol  
5 and water.
- 6 2. Take a gene frame (ABgene; 1.7 x 2.8 cm) and carefully remove one of the plastic  
7 foils from the gene frame without causing disassembly of the plastic cover on the  
8 other side of the gene frame. Attach the gene frame in the middle of one of the glass  
9 slides by first facilitating contact on just one side, followed by guided attachment of  
10 the remaining gene frame with a fingernail. Prevent air bubbles while attaching the  
11 gene frame to the glass slide.
- 12 3. Prepare a similar gene frame glass slide and place this one in a sterile petridish at 30  
13 °C to pre-warm the slide.
- 14 4. Supplement time-lapse CDM (20) with maltose sporulation medium (MSM) (8) in a  
15 1:50 dilution.
- 16 5. Mix 1.5 ml of this medium with 500 µl 40% polyacrylamide (PAA) solution (Serva,  
17 acrylamine/BIS 37.5:1). Add 20 µl 10% ammonium persulphate (APS) and 2 µl  
18 TEMED and then immediately pour 500 µl of this liquid within the gene frame on the  
19 prepared microscope glass slide. Make sure the whole area, including the borders, is  
20 fully covered.
- 21 6. Place the second glass slide on the PAA-filled gene frame. Try to avoid air bubbles.  
22 Leave the prepared slide at room temperature for 30 minutes to allow for  
23 polymerization.
- 24 7. After polymerization, remove the upper glass slide carefully and cut the PAA patch in  
25 six equal-sized strips using a sterilized scalpel. Carefully place the slices in sterile mQ

26 water in a petridish and wash the strips for 30 minutes on a shaking table. Repeat this  
27 washing step with fresh mQ for another 30 minutes and then replace the mQ water  
28 with CDM + 1:50 MSM for the final wash step. Continue the washing of the slices  
29 until the cells are ready.

30 8. Take the pre-warmed glass slide and place up to three strips between the gene frame,  
31 making sure there are gaps on either side of the slice. Due to some swelling during the  
32 washing, cutting of the strips to fit within the gene frame may be necessary. Remove  
33 the second protective plastic layer from the gene frame.

34 9. Now add 1.5  $\mu$ l of prepared cells (see section 'culture preparation') onto a PAA strip:  
35 Load single cells on the solid medium without touching it with the pipet tip. Always  
36 start on top of the PAA patch and allow the liquid to disperse equally on its assigned  
37 growth area by turning the slide up and down. The slide is ready, as soon as the edges  
38 of the liquid become corrugated and movement of the liquid is no longer visible when  
39 turning the slide.

40 10. Place a clean microscope slide cover slip (24 x 50 mm) on the gene frame from one  
41 side to the other (avoid air bubbles). Assure complete attachment by applying  
42 pressure on the cover slip along the gene frame with your fingernail. If the cover slip  
43 is placed on the cells without allowing them to dry long enough, cells tend to grow on  
44 top of each other during the experiment. Also be careful not to wait too long before  
45 applying the cover slip, since the PAA will then be too dry.

46 11. Immediately search for single cells using an inverted microscope with prewarmed  
47 climate chamber and time-lapse microscopy software. Make sure to select cells that  
48 are relatively close to the periphery of the PAA slice, as oxygen distribution in the  
49 middle of the slice is poor and hampers growth and development of the cells and also  
50 negatively affects fluorescence.

51

52 **Table S1** Primers used in this study.

| Primer name          | Sequence                                      | Properties                                         |
|----------------------|-----------------------------------------------|----------------------------------------------------|
| Bce14_cD800HindIII-F | CCCAAGCTTGACAAAAATAGACAGATACTCC               | HindIII                                            |
| Bce14_cDpstI-R       | GCATTGGTTCTGCAGATGCATAGTTTTTCTCTCCTC          | PstI, includes the first two codons of <i>cotD</i> |
| TIFN73               | CGCGGGTACCGATGGGAAATACGGTTTAATCG              | KpnI                                               |
| TIFN74               | CGCGTCTAGACTTTTTTATTAAAAATAAAACTCCGATTGTTTTTC | XbaI                                               |
| TIFN75               | CGCGGGTACCGATGAATACAGCTGGACAAATG              | KpnI                                               |
| Bce14-upctD-Xba-R    | GCTCTAGACTCTCGTTAAAAAATCTGATTACAC             | XbaI                                               |
| TIFN77               | CGCGGGTACCGATTTCACAGTCATACATTTTCGCG           | KpnI                                               |
| TIFN78               | GCGCTCTAGACGGGAGTTGCTGTACAGTG                 | Xba                                                |

53

54 **Figure S1**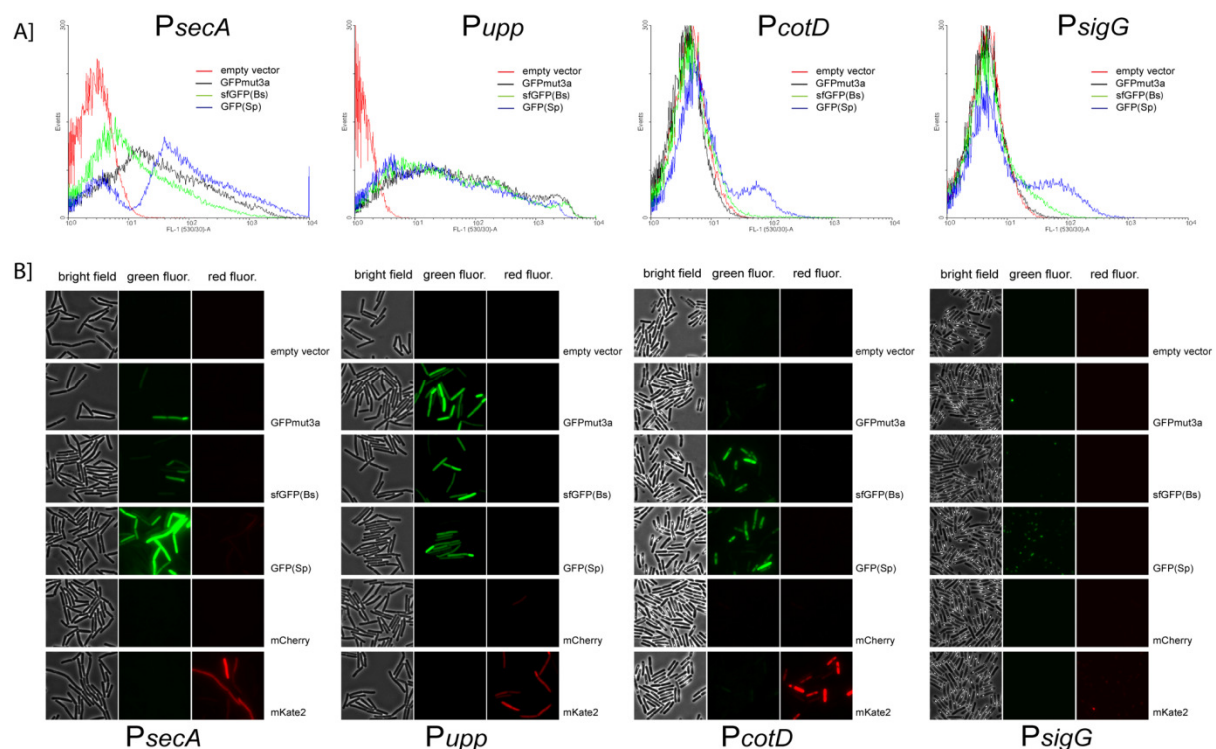

59 ( $P_{secA}$ ,  $P_{upp}$ ,  $P_{cotD}$  and  $P_{sigG}$ ). **A]** The fluorescence intensity and distribution of the various  
60 GFPs was monitored using flow cytometry analysis as described in the Materials and  
61 Methods section. The fluorescence intensity (in arbitrary units) is shown on the X-axis  
62 against the number of events (max 50,000) on the Y-axis. As a negative control, the empty  
63 vector pAD123 was used (no fluorescent signal, represented by the red line). GFPmut3a is  
64 represented by the black line, sfGFP(Bs) by the green line and GFP(Sp) by the blue line. **B]**  
65 The fluorescence intensity and distribution of the various GFPs and RFPs was monitored  
66 using fluorescence microscopy analysis, as described in the Materials and Methods section.  
67 Arbitrary pictures taken in the bright field channel, the green fluorescence channel (FITC)  
68 and the red fluorescence channel (TRITC) are shown for each promoter.
